# Supplementary material for: Hydrogen sulfide inhibits calcification of heart valves; implications for calcific aortic valve disease
Source: PubMed Central journal article supplement (PMC7024713; doi:10.1111/bph.14691), 2019-04-24
Supplement: BPH-177-793-s001.pdf [file BPH-177-793-s001.pdf]

A

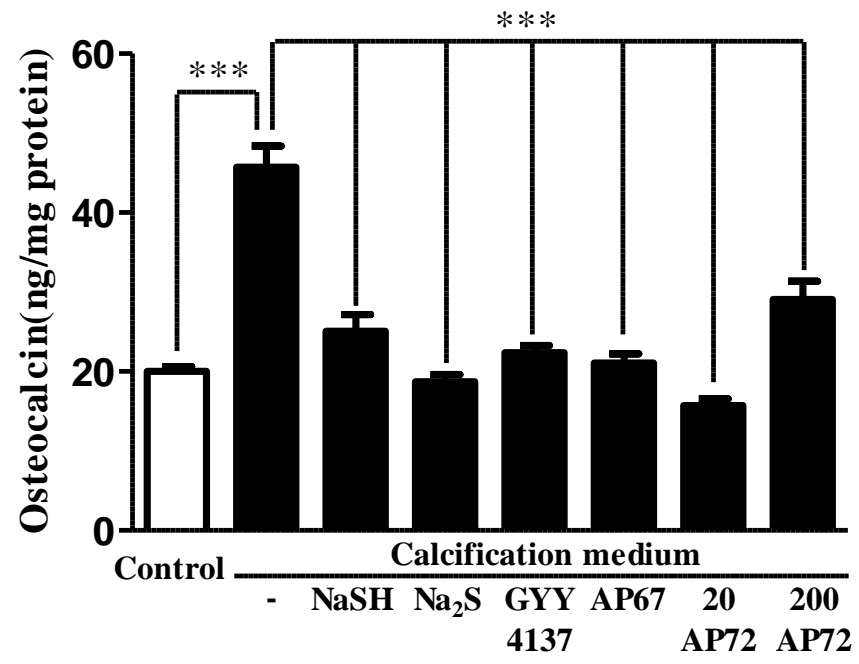

B

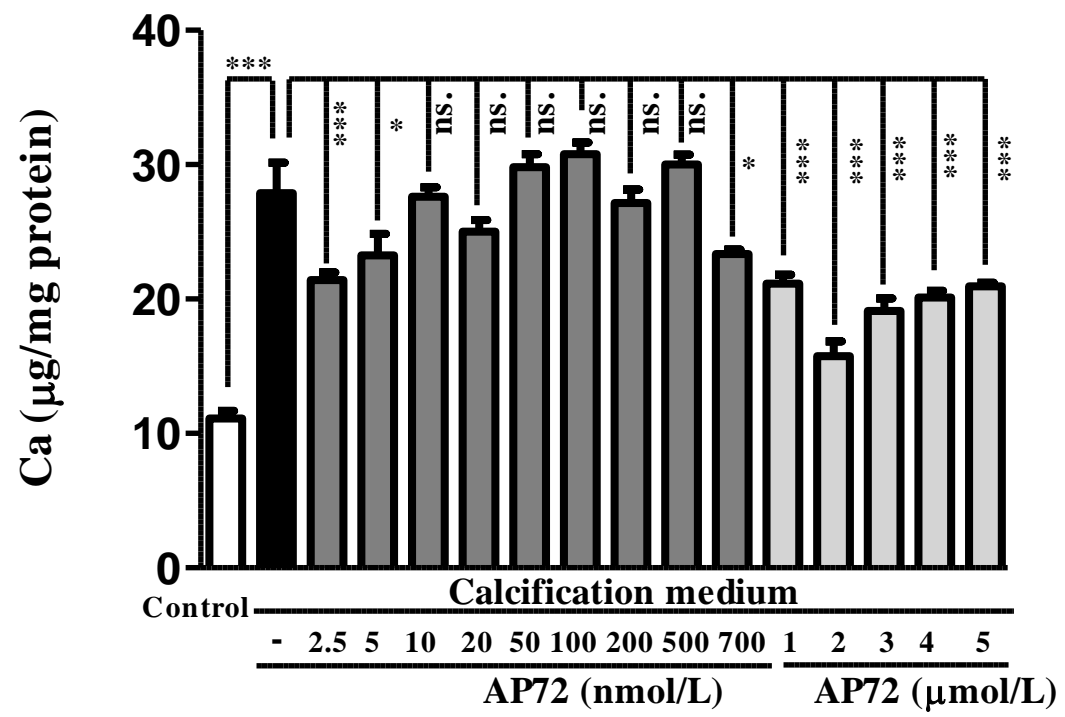

C

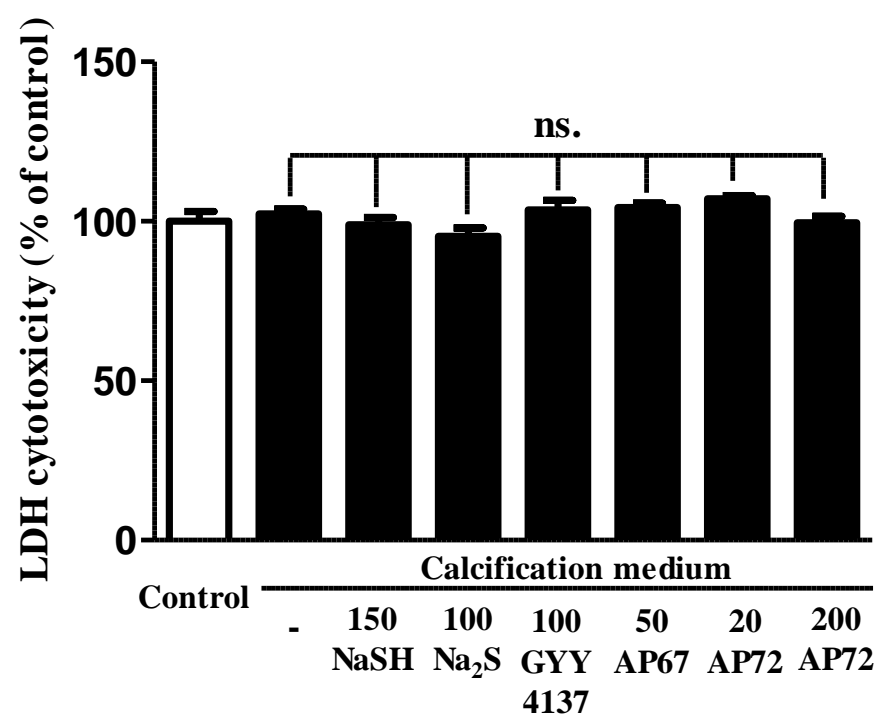

**A**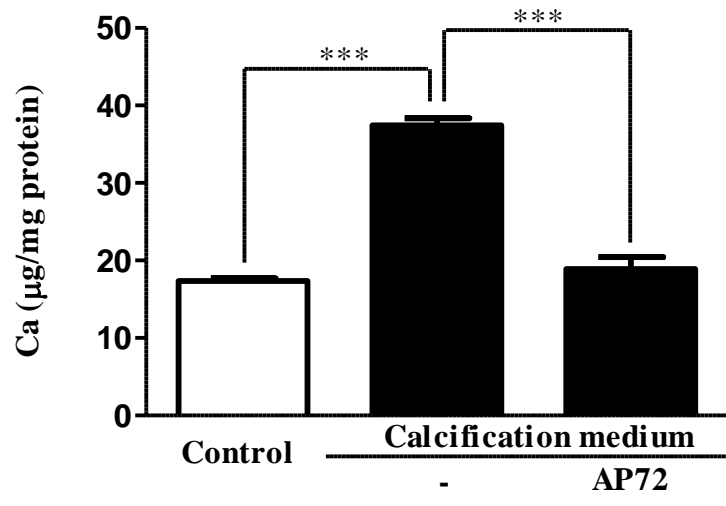**B**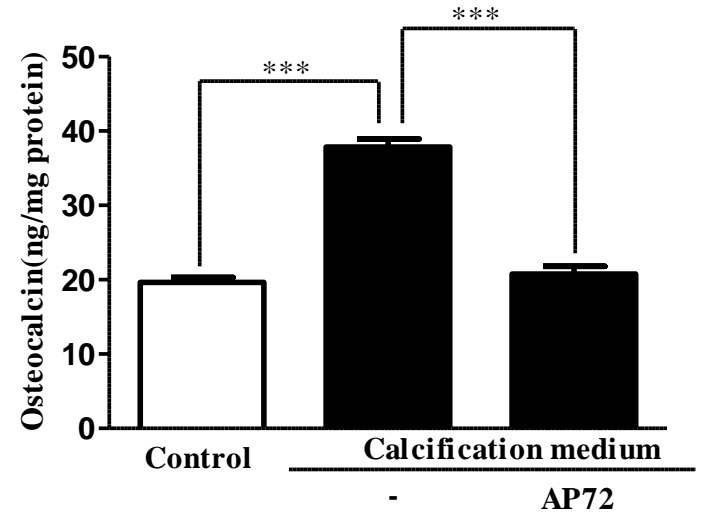**C**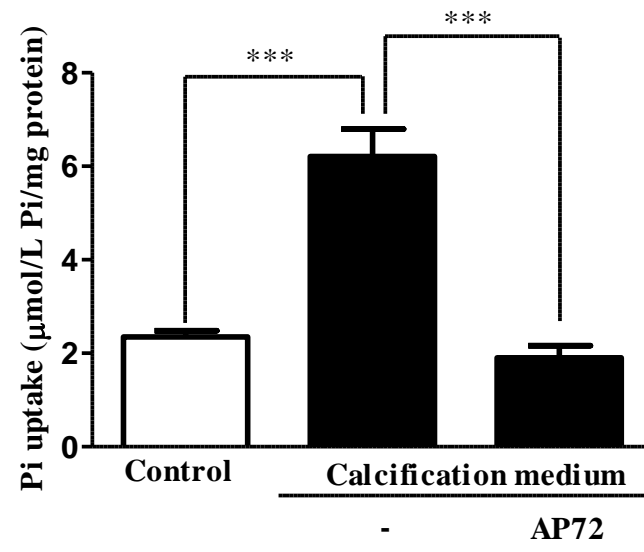**D**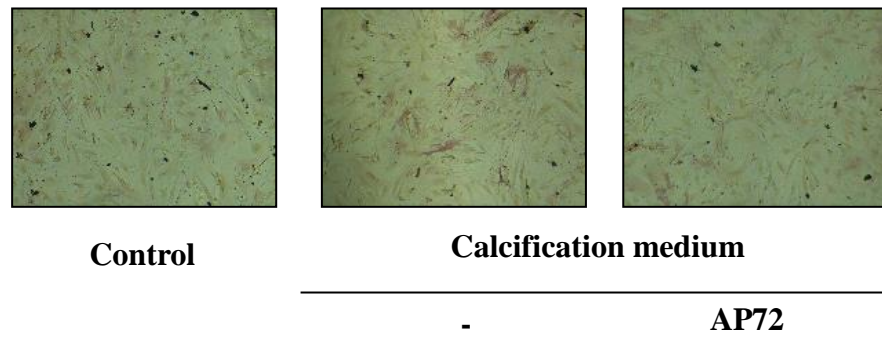**E**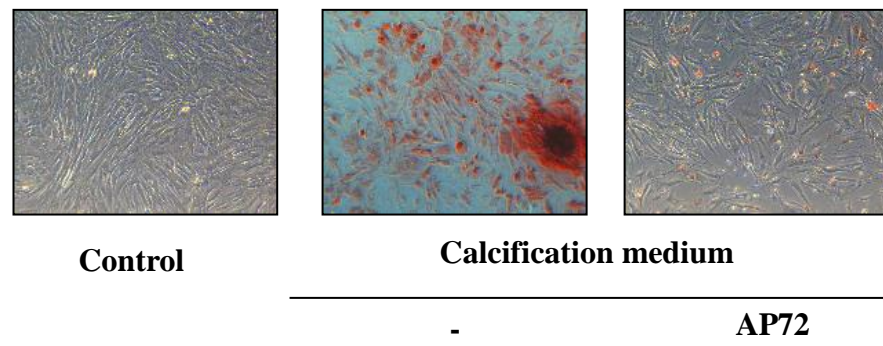**F**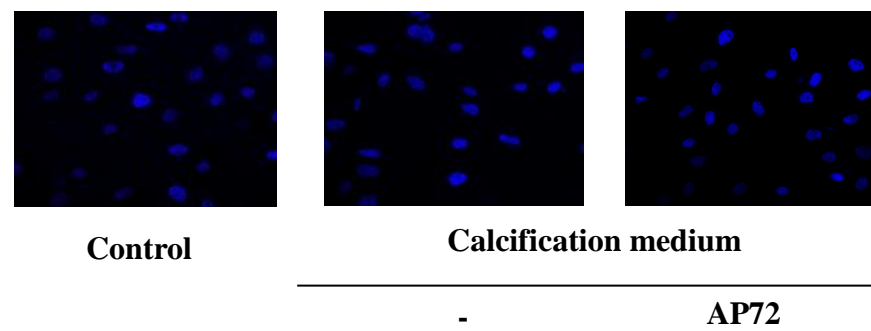



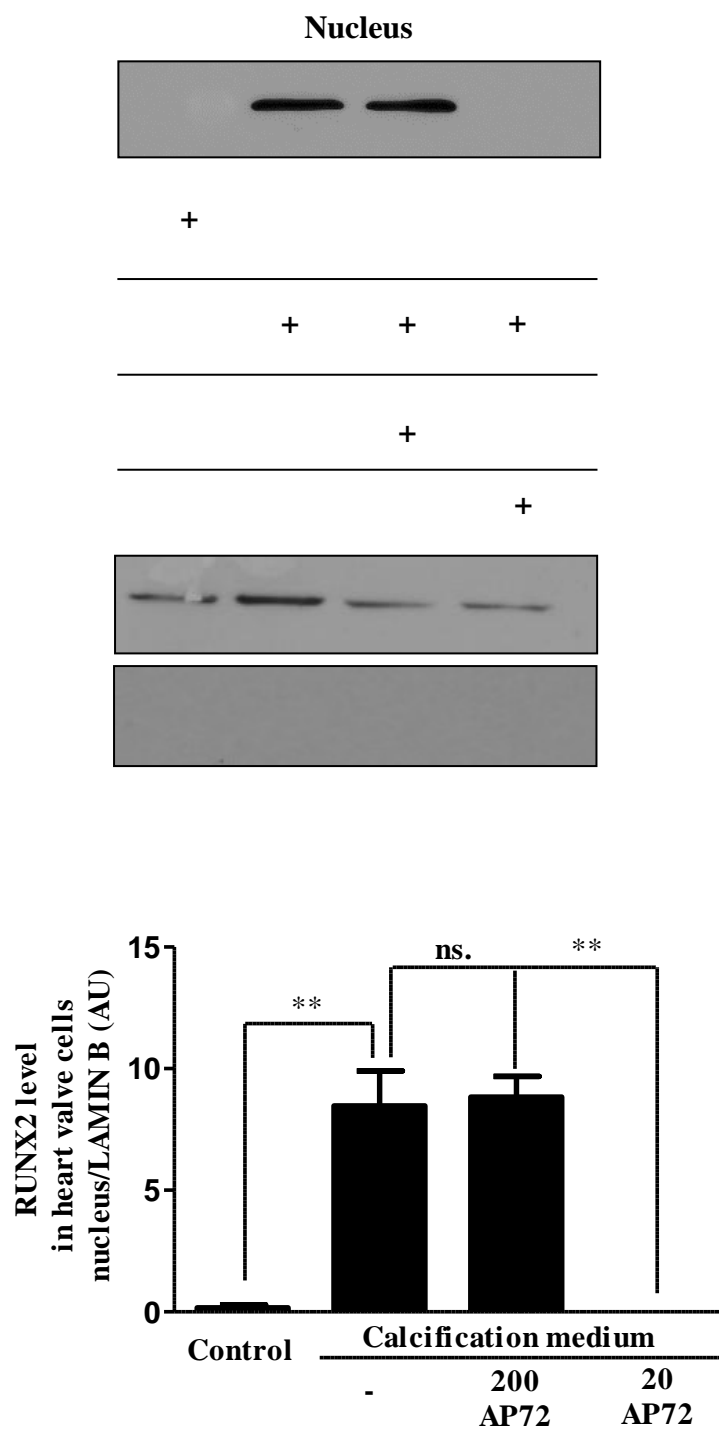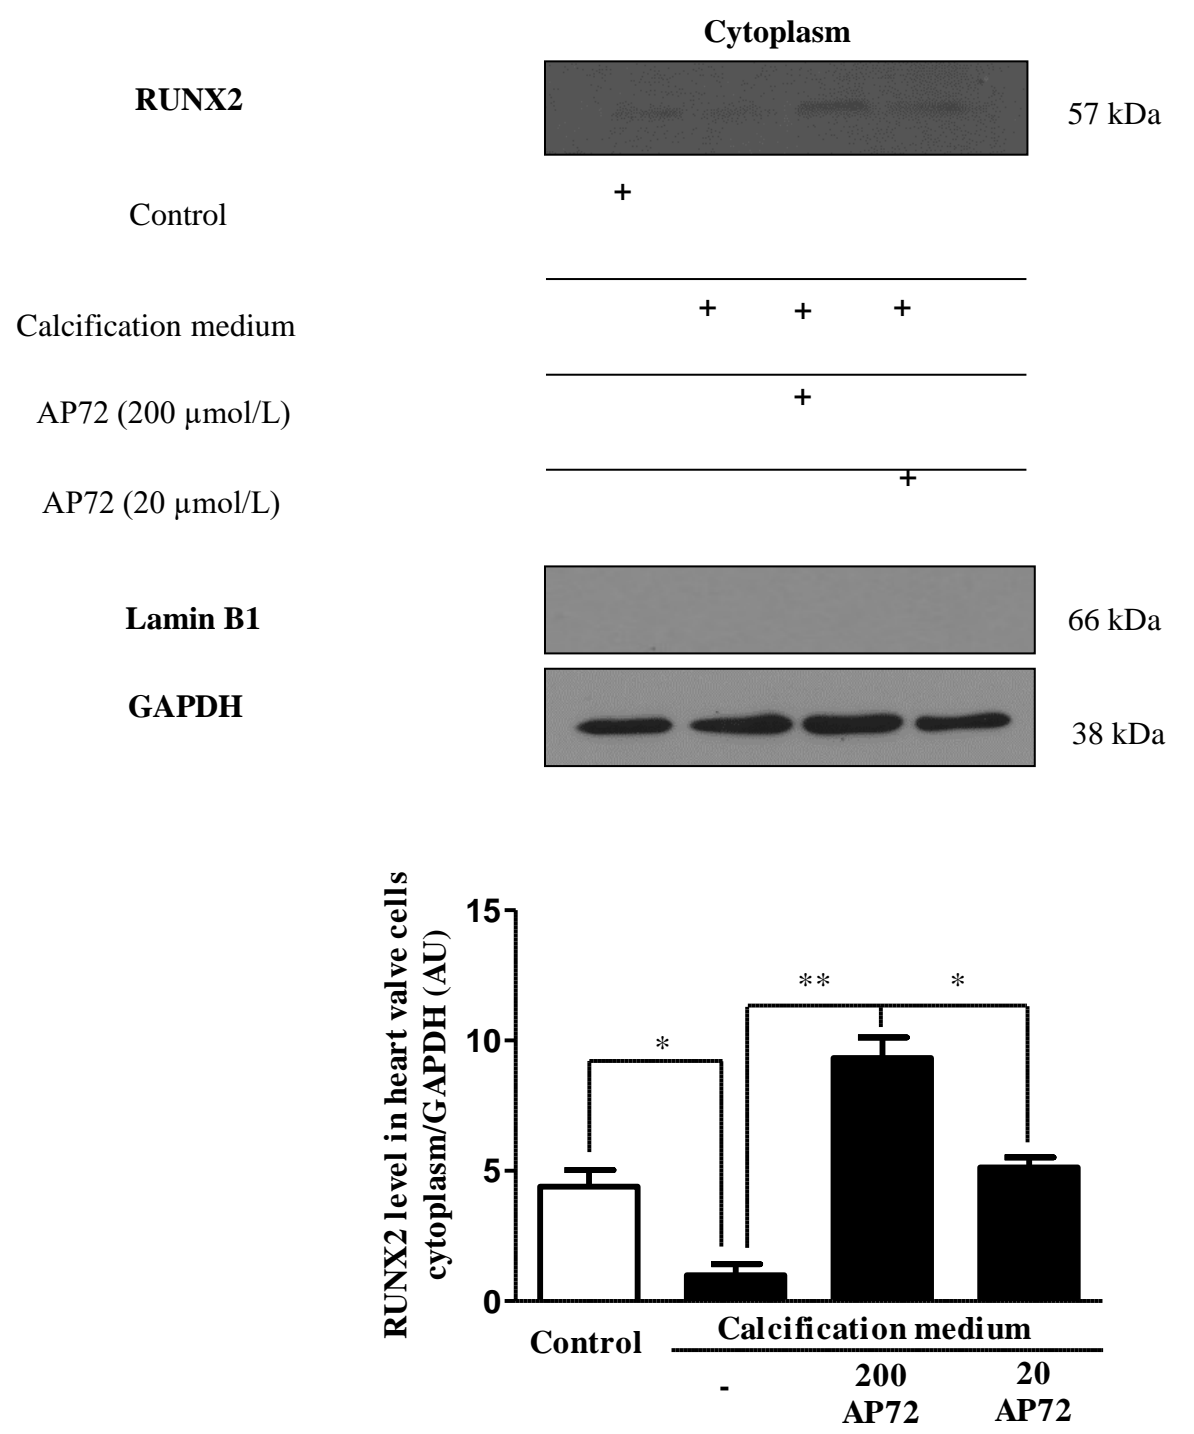

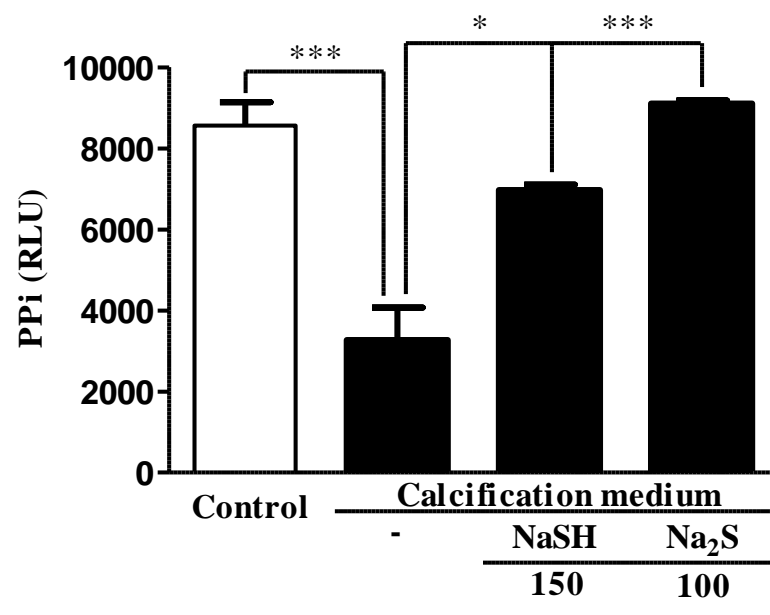

A

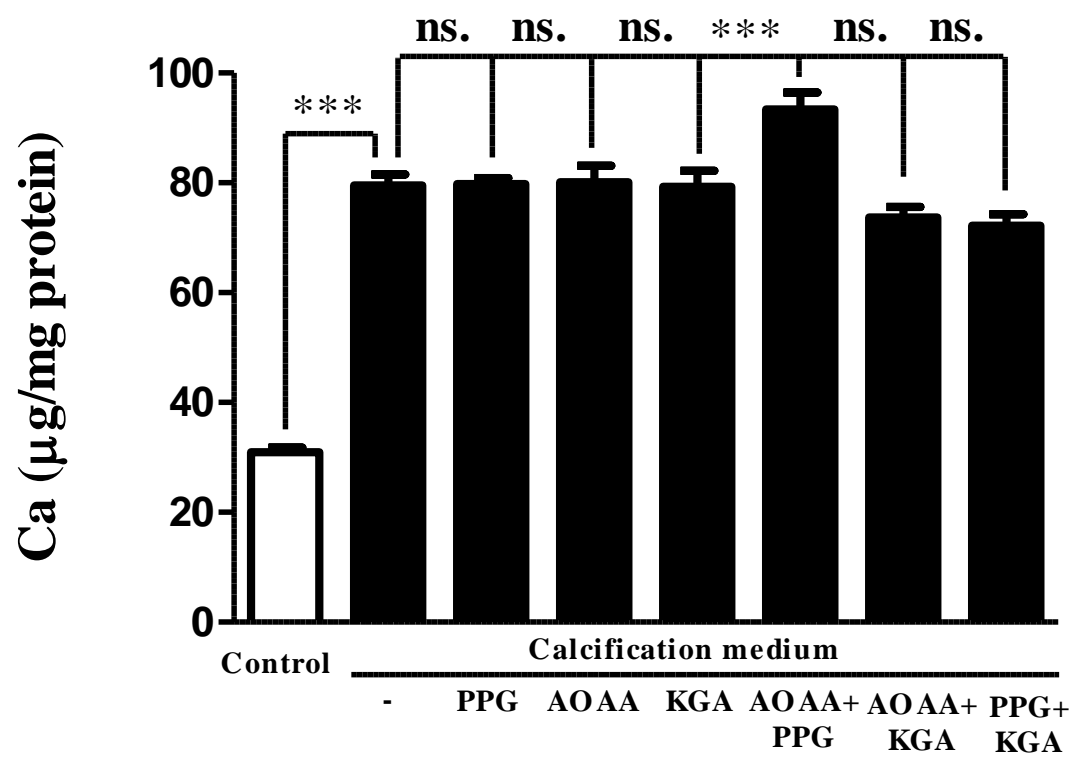

B

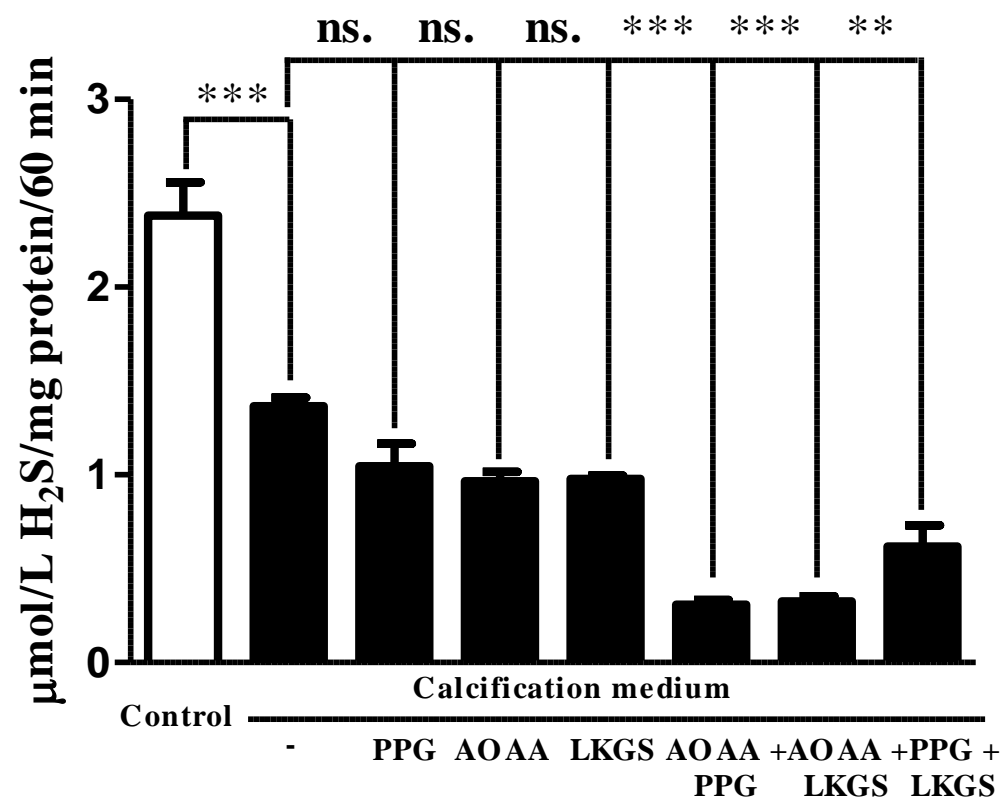

**A**

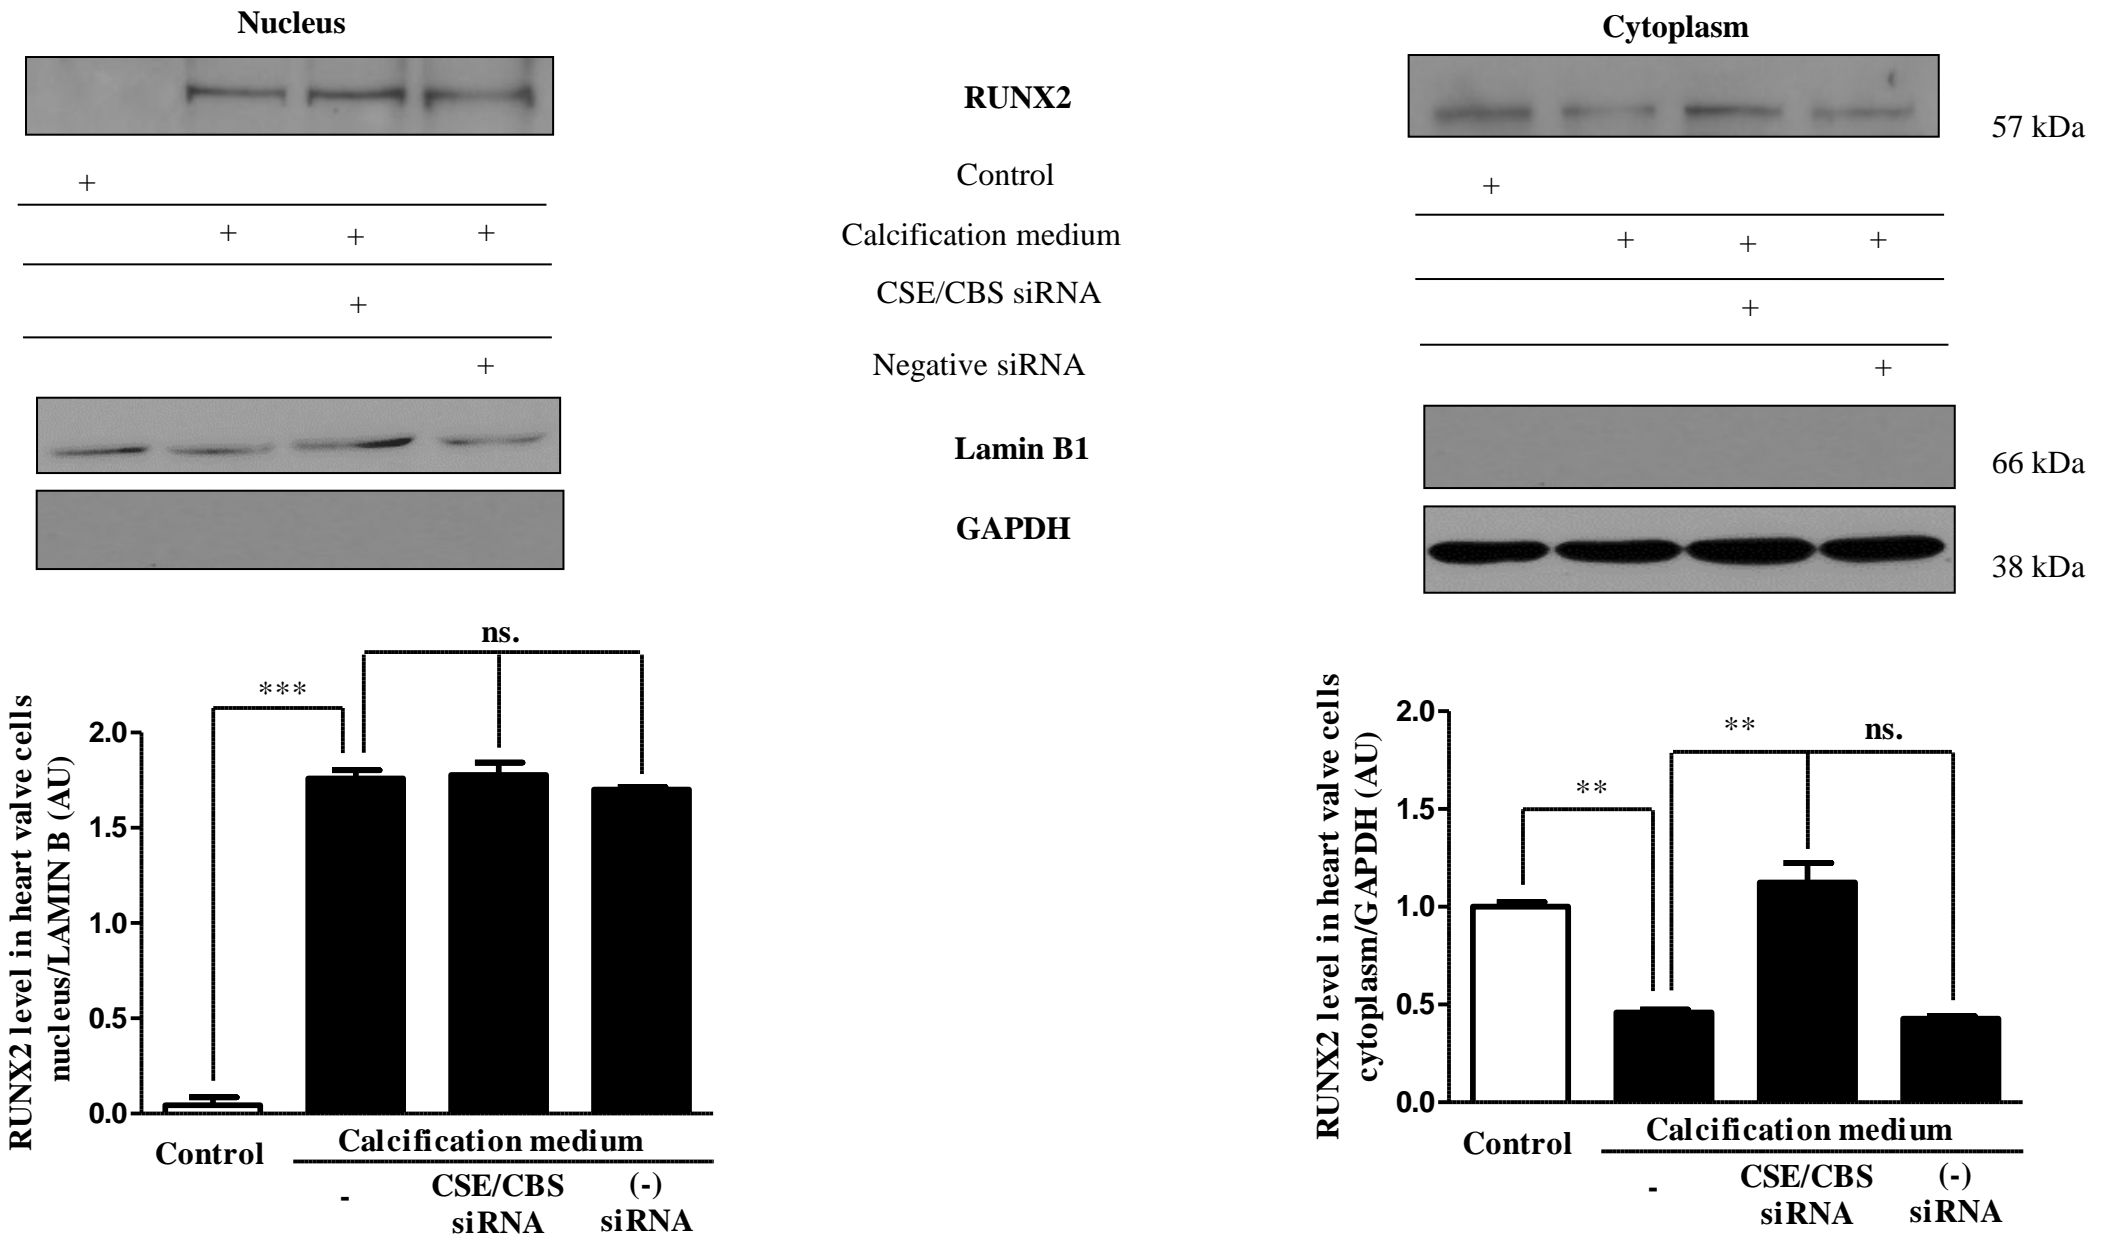

**B**

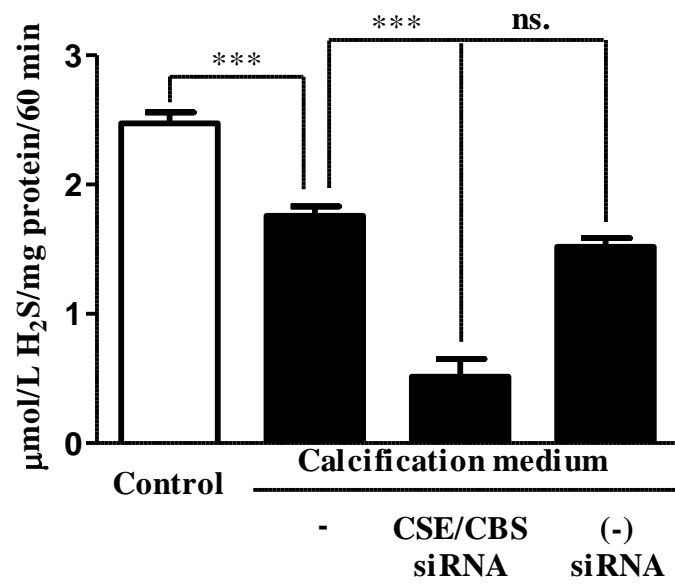

**C**

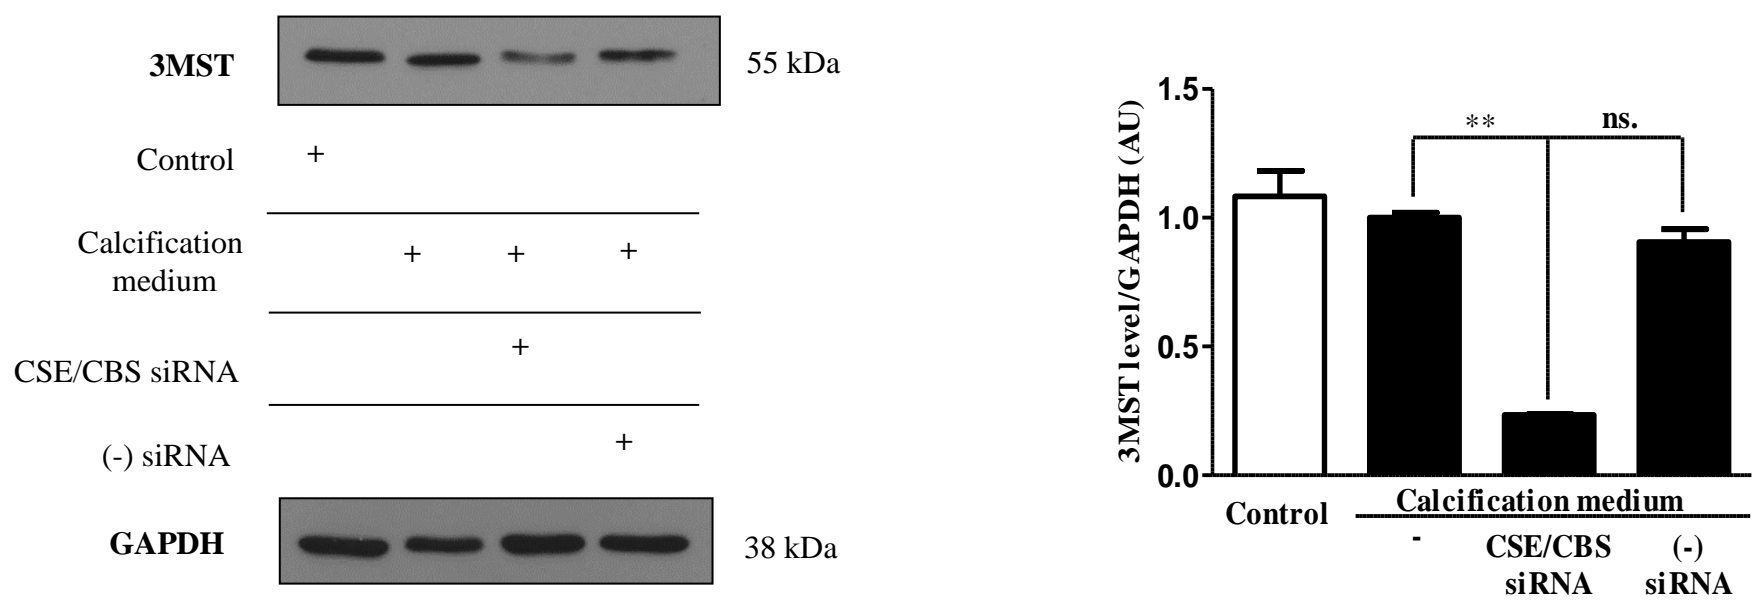

**A**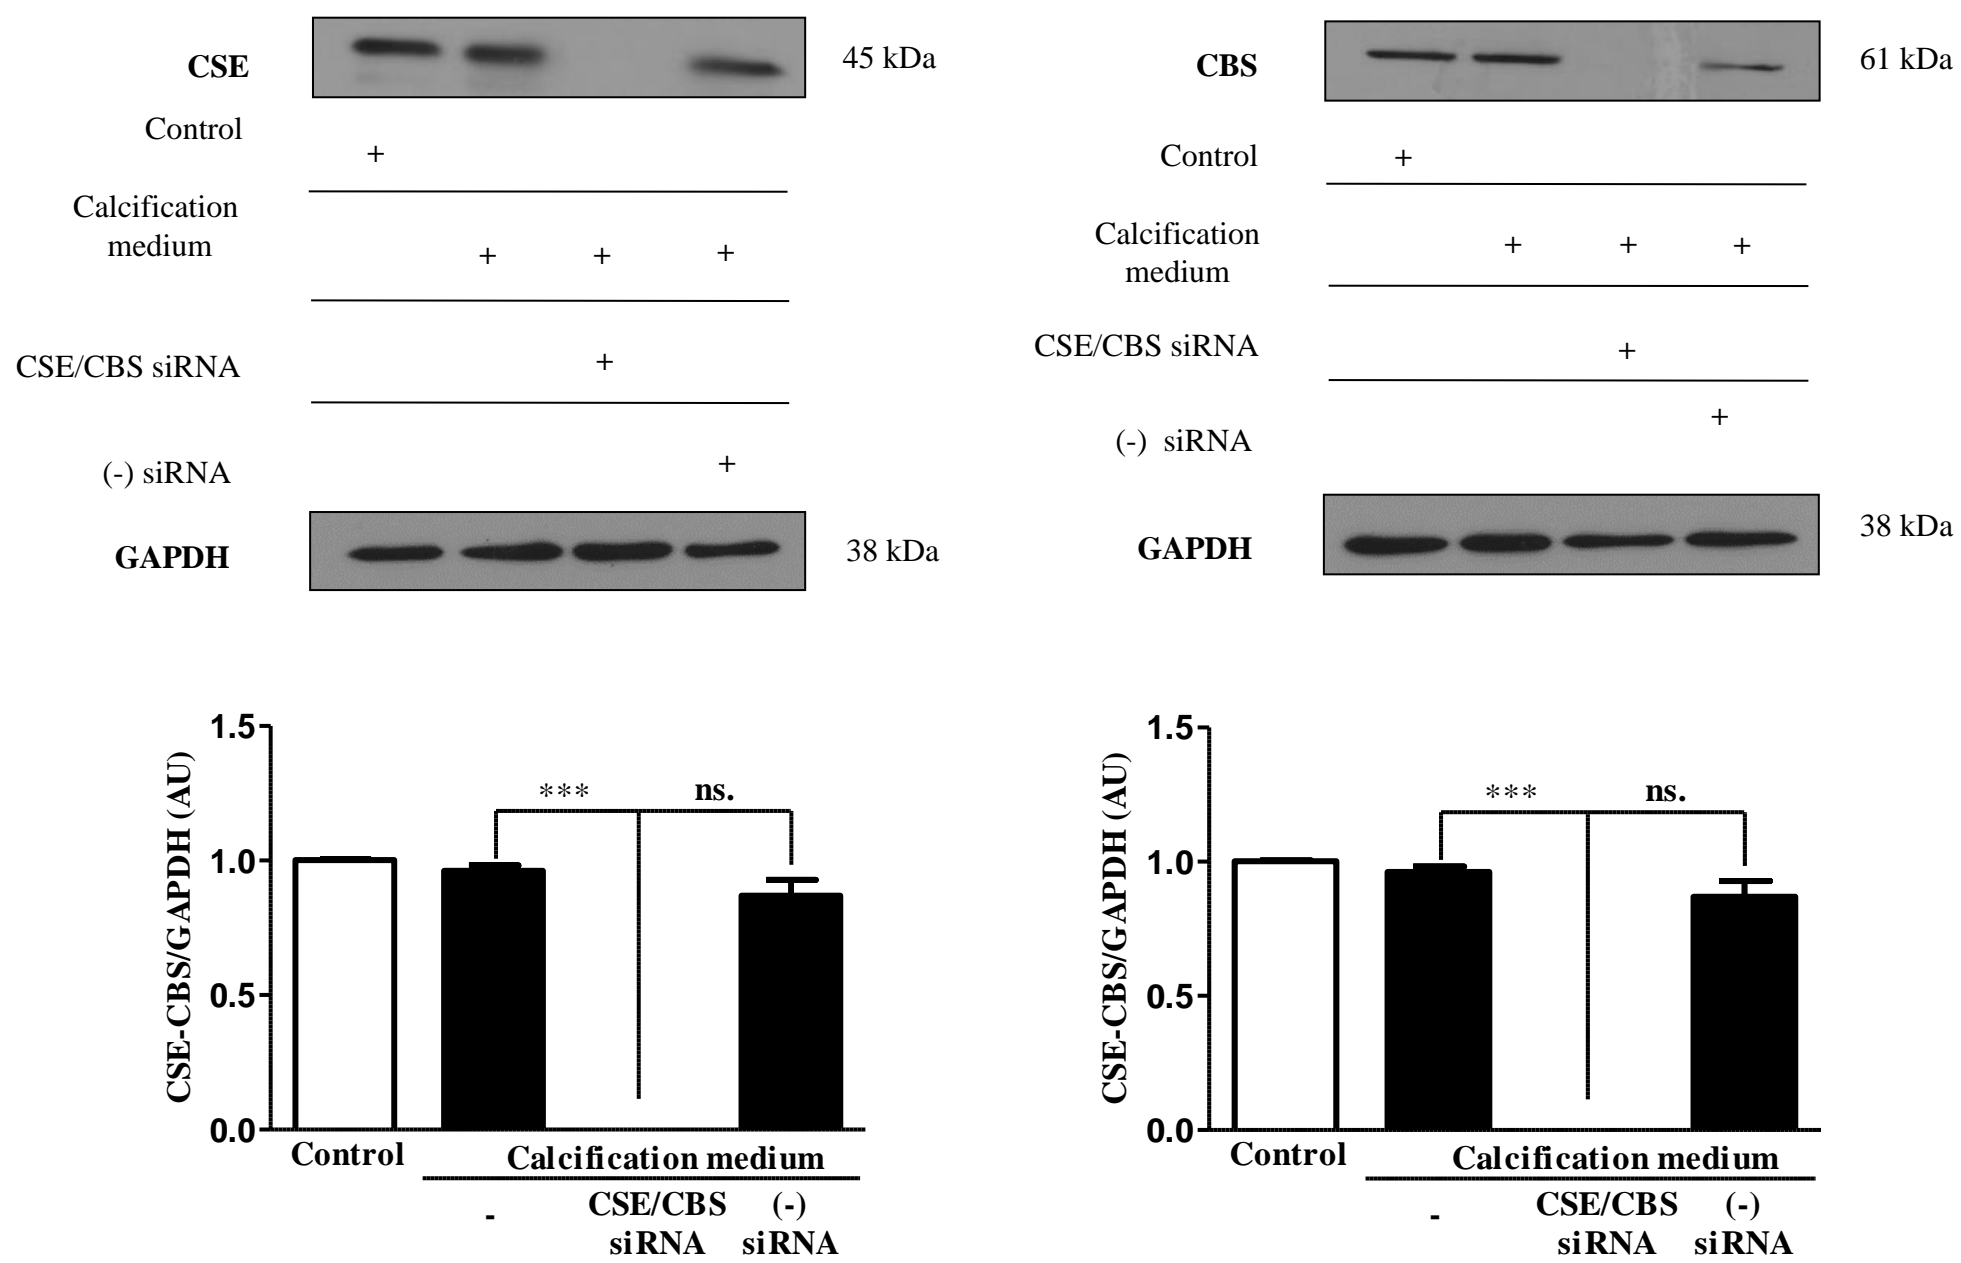**B**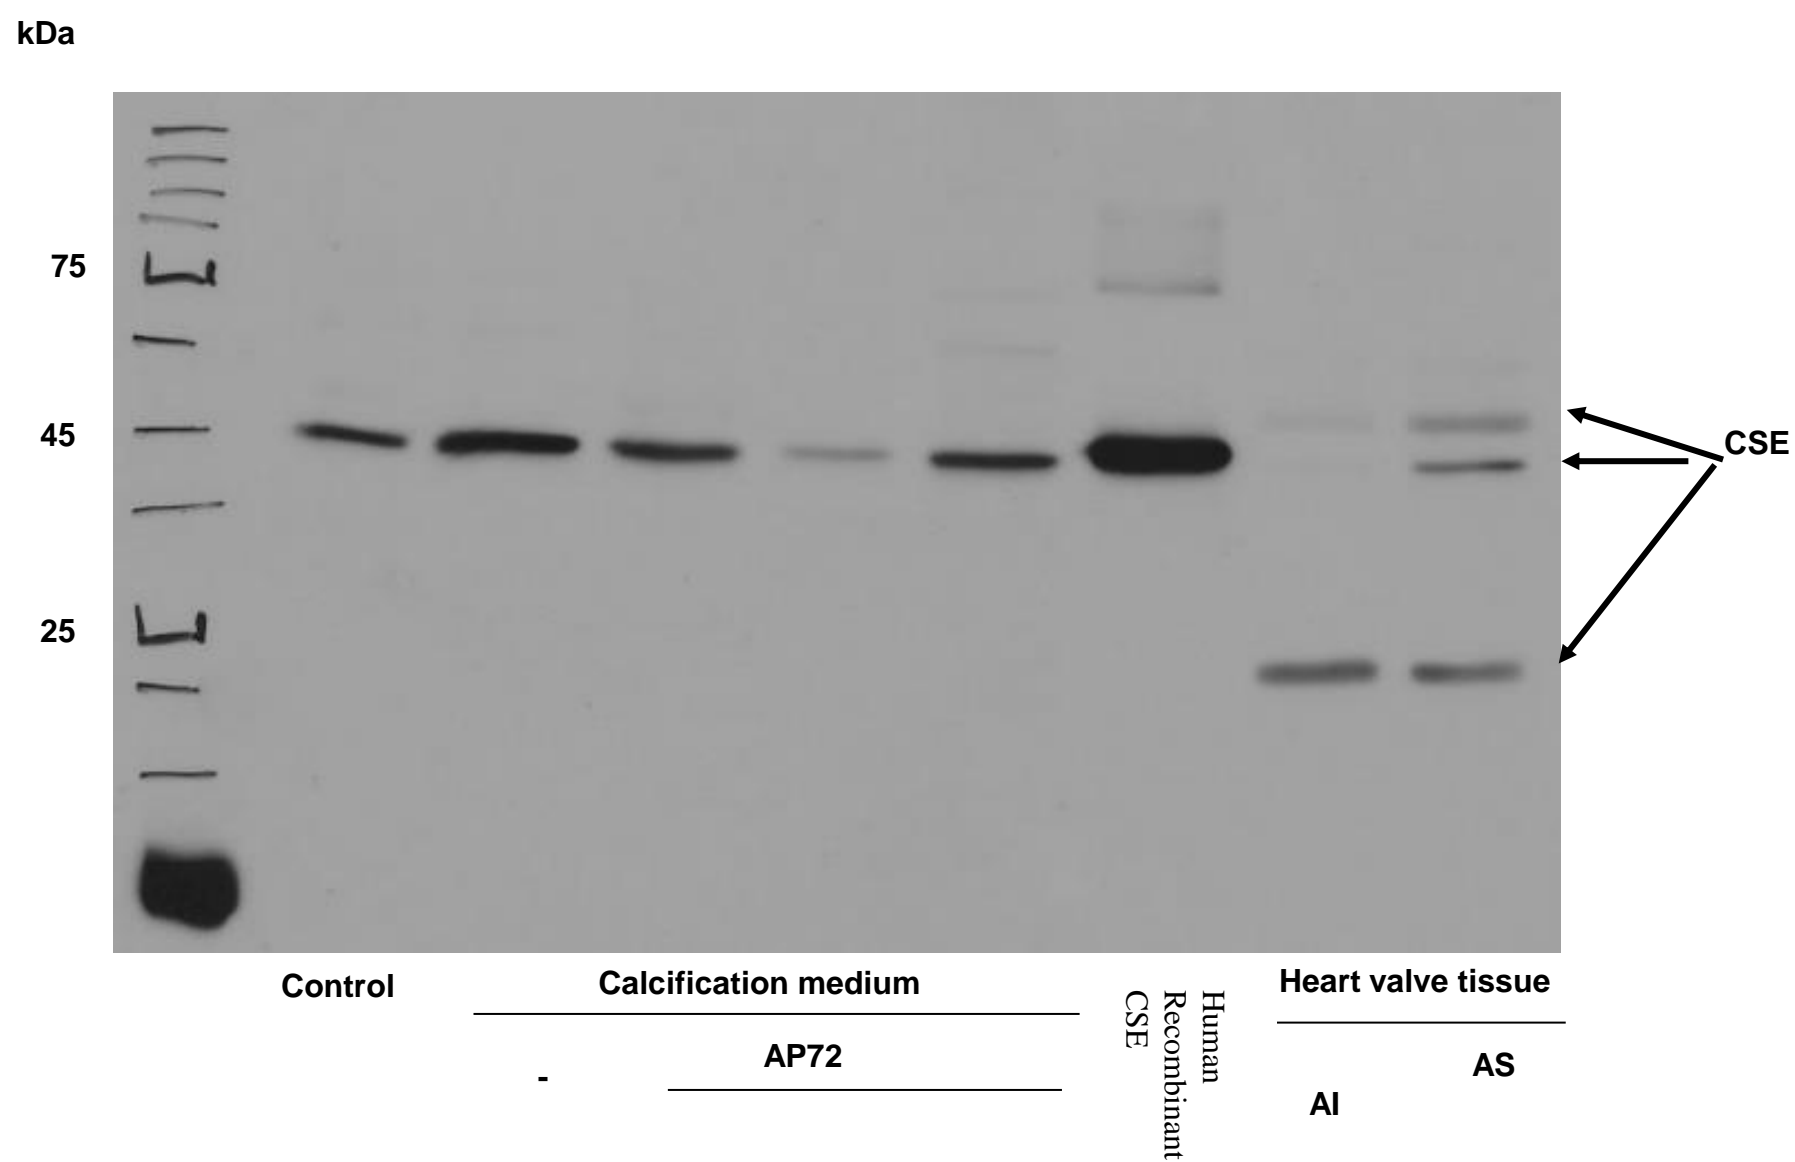



## **SUPPLEMENTARY FIGURE LEGENDS**

### **Supplementary Figure 1. Osteocalcin levels, calcium deposition and cytotoxicity in VIC**

Cells were cultured on 24 well plates for 5 days in growth medium or calcification medium and supplemented with NaSH (150 $\mu$ mol/L); Na<sub>2</sub>S (100  $\mu$ mol/L); GYY4137 (50  $\mu$ mol/L); AP67 (20  $\mu$ mol/L); AP72 (200  $\mu$ mol/L). A) Osteocalcin level of the cells were measured after 5 days and normalized to the protein content of the cells. Graph shows mean  $\pm$ SEM of five separate experiments. B) VIC was cultured in phenol red-free growth or calcifying conditions or supplemented with AP72 (2.5 nmol/L to 5  $\mu$ mol/L) and calcium content was measured. C) LDH cytotoxicity in VIC exposed to H<sub>2</sub>S donors was assessed. All experiments were performed. Results were shown mean  $\pm$ SEM at least of six independent experiments. Ns.: not significant; \*P < 0.05; \*\*\*P < 0.001.

### **Supplementary Figure 2. In phenol red-free condition AP72 inhibits valvular calcification at 2 $\mu$ mol/L**

VIC were cultured in growth medium or calcification medium alone (without phenol red) or supplemented with AP72 (2  $\mu$ mol/L) for 5 days. A) Calcium content and B) osteocalcin level C) Phosphate uptake of the cells were measured after 5 days and normalized to the protein content of the cells. D) Alkaline phosphatase staining, E) Alizarin Red S staining provides representative microscopic images of extracellular calcium depositions. F) Fluorescence staining assay for cytotoxicity was assessed. Scale bar: 50  $\mu$ m. Graph shows mean  $\pm$ SEM of five separate experiments. \*\*\*P < 0.001.

### **Supplementary Figure 3. Inhibition of valvular calcification by AP72**

VIC was cultured in growth medium or calcification medium alone or supplemented with AP72 (20  $\mu$ mol/L) for 5 days. A) Calcium content and B) osteocalcin level of the cells were measured after 5 days and normalized with the protein content of the cells. C) Alkaline phosphatase staining and D) Alizarin Red S staining provide representative microscopic images of extracellular calcium depositions. E) Differences in cellular cytotoxicity is visualized using a fluorescence staining assay (see Methods). Scale bar: 50  $\mu$ m. Graph shows mean  $\pm$ SEM of five separate experiments. \*\*\*P < 0.001.

### **Supplementary Figure 4. RUNX2 nuclear translocation in calcifying condition in the presence of 20 and 200 $\mu$ mol/L of AP72**

VIC grown on coverslips were exposed to growth medium or calcification medium alone or supplemented with AP72 (20 and 200  $\mu$ mol/L) for 24 hours. A) RUNX2 levels of cytoplasm and nucleus were determined by Western blot analyses. The band intensities are normalized to Lamin B1 in case of nuclear extracts and for GAPDH in case of cytoplasm extracts. Representative staining of five independent experiments was shown. Ns.: not significant; \*\*P < 0.01; \*\*\*P < 0.001.

### **Supplementary Figure 5. Changes of PPI levels by fast sulfide donor treatment on VIC**

VIC were cultured in growth medium or calcification medium in the presence or absence of NaSH or Na<sub>2</sub>S for 5 days. PPI levels of VIC were measured and normalized to protein content of the cells. Graph shows mean ±SEM of five separate experiments. \*P < 0.05; \*\*\*P < 0.001.

**Supplementary Figure 6. Inhibition of H<sub>2</sub>S production by pharmacological inhibitors in VIC**

A) Calcium accumulation of extracellular matrix of VIC maintained in growth medium or calcification medium after 5 days treatment with PPG; AOAA; KGA; AOAA+PPG; AOAA+KGA; PPG+KGA (20 μmol/L each inhibitor). Calcium levels of VIC were normalized to protein content of the cells. B) H<sub>2</sub>S production of VIC treated with pharmacological inhibitors alone or in combination was detected. Generation of H<sub>2</sub>S was normalized to the protein content of cells. Graph shows mean ±SEM of five separate experiments. Ns.: not significant; \*\*\*P < 0.001.

**Supplementary Figure 7. CSE/CBS silencing enhanced the progression of calcification and decreased the expression of 3-MST**

CSE and CBS double gene silencing using siRNAs were performed. Cells were transfected with siRNA against CSE/CBS. Next day cells were washed and treated with high inorganic phosphate and calcium for 3 days. A) RUNX2 expression in a nuclear and cytoplasmic fraction were shown. B) H<sub>2</sub>S production of CSE/CBS silenced samples was measured. C) Western blot demonstrated expression of 3-MST in CSE/CBS silenced VIC. Graph shows mean ±SEM of five independent experiments. Ns.: not significant; \*\*P < 0.01; \*\*\*P < 0.001.

**Supplementary Figure 8. CSE and CBS expression of the double silenced VIC**

A) VIC were cultured in growth or calcification medium and transfected with siRNA for CSE/CBS. Next day VIC were treated with calcification medium for 3 days. CSE (left panel) and CBS (right panel) protein level were measured. Samples were normalized to GAPDH. B) Western blot of the CSE protein of VIC lysate and AI/AS were shown. Human recombinant CSE protein (5 and 10 ng) was used as a positive control. Ns.: not significant; \*\*\*P < 0.001.

## Sequences of the siRNA

CTH si RNA sequence:

>gnl|UG|Hs#S6091963 Homo sapiens cystathionase (cystathionine gamma-lyase) (CTH), transcript variant 2, mRNA /cds=p(199,1284) /gb=NM\_153742 /gi=299473760 /ug=Hs.19904 /len=2008

TCGTGAGACTGCAGACCCGCTAATAAAAATCCACCCCAACAATCGCTGTGTGCCGCTTTAG  
TGCGCTCGCCGTCGGCTCTACCTGCGTGCTTTAGCTCCTTCTCGCCTGATCCTTCTGTCT  
CTCCCAACCCCGGACACCCGGCTTCGACTGGTTATATCTTCGGTGTTCCTTTCTCTCTT  
CTTCTTTTCGCGGTTTCAGCATGCAGGAAAAAGACGCCTCCTCACAAGGTTTCCTGCCACAC  
TTCCAACATTTTCGCCACGCAGGCGATCCATGTGGGCCAGGATCCAGAGCAATGGACCTCC  
AGGGCTGTAGTGCCCCCATCTCACTGTCCACCACGTTCAAGCAAGGGGCGCCTGGCCAG  
CACTCGGGTTTTGAATATAGCCGTTCTGGAAATCCCCTAGGAATTGCCTTGAAAAAGCA  
GTGGCAGCACTGGATGGGGCTAAGTACTGTTTGGCCTTTGCTTCAGGTTTAGCAGCCACT  
GTA ACTATTACCATCTTTTAAAAGCAGGAGACCAAATTATTTGTATGGATGATGTGTAT  
GGAGGTACAAACAGGTACTTCAGGCAAGTGGCATCTGAATTTGGATTAAAGATTTCTTTT  
GTTGATTGTTCCAAAATCAAATTA CTAGAGGCAGCAATTACACCAGAAACCAAGCGCCCT  
TTGGCTCTGGGAGCTGATATTTCTATGTATTCTGCAACAAAATACATGAATGGCCACAGT  
GATGTTGTAATGGGCCTGGTGTCTGTTAATTGTGAAAGCCTTCATAATAGACTTCGTTTC  
TTGCAAAACTCTCTTGGAGCAGTTCATCTCCTATTGATTGTTACCTCTGCAATCGAGGT  
CTGAAGACTCTACATGTCCGAATGGAAAAGCATTTCAAAAACGGAATGGCAGTTGCCAG  
TTCTGGAATCTAATCCTTGGGTAGAAAAGGTTATTTATCCTGGGCTGCCCTCTCATCCA  
CAGCATGAGTTGGTGAAGCGTCAGTGTACAGGTTGTACAGGGATGGTCACCTTTTATATT  
AAGGGCACTCTTCAGCATGCTGAGATTTTCCTCAAGAACCTAAAGCTATTTACTCTGGCC  
GAGAGCTTGGGAGGATTCGAAAGCCTTGCTGAGCTTCCGGCAATCATGACTCATGCATCA  
GTTCTTAAGAATGACAGAGATGTCCTTGGAAATTAGTGACACACTGATTCGACTTTCTGTG  
GGCTTAGAGGATGAGGAAGACCTACTGGAAGATCTAGATCAAGCTTTGAAGGCAGCACAC  
CCTCCAAGTGGAAGTCACAGCTAGTATTCCAGAGCTGCTATTAGAAGCTGCTTCCTGTGA

AGATCAAATCTTCCTGAGTAATTAATGGACCAACAATGAGCCTTTGCAAATTTTCAAG  
CGGAAATTTTAAGGCACCTCATTATCTTTCATAACTGTAATTTTCTTAGGGATCATCTCT  
GTTAAAAAGTTTTCTGTATGTCATGTTATAATTACAGGTCAATTCTGTTAATATCTTTTT  
GTTAATTTTGCTCTATGTTTGCCTCTGAAGGAGGTGAGATTTGTGCTACTTTGGGAGATT  
ATGTTCTTTTTTCATGTCTAAGATTTATTTTGATCATGTTTATAATATAATGGTAATTCA  
TTTTTGATGTTTTGTGAAGAATTTAAATTTAAACGAATGTTCTTAAATCAAGTGTGATTT  
TTTTGCATATCATTGAAAAGAACATTAAGCAATGGTTTACACTTAGTTACCATAAGCC  
GAAAATCAAATACTTGAAAAGTTTACTGTGAAATTCTACTGATTTAAGACTATACTTAAT  
ATTTTTAAAAAATAAATCAGCTGGGCGCGGTGGCTCACGCATGTAATGCCAGCACTTTT  
GGAGGATAAGGCGGGCGGATCACGAGGTCAGGAGATTGAGACCATCCTGGCTAGCGCAGT  
GAAACCCCATCTCTACTAAAAATGCAAAAAAATTAGACGGACGTGGTGGCGGGTGCCT  
GTAGTCCCAGCTACTTGGGAGGCTGAGG

CBS siRNA sequence

>gnl|UG|Hs#S55481398 Homo sapiens cystathionine-beta-synthase (CBS), transcript variant 2, mRNA  
/cds=p(223,1878) /gb=NM\_001178008 /gi=295821199 /ug=Hs.533013 /len=2586

CACGCCCTCGGGGTCGGTCCTCGAGGACGCGCAGGGCCCCCACCCACCAGGACGCACGT  
TTCAAGCTCATCAGTAAAGGTTTCTTAAATTCCCGAAGGGCAAGAAGTTAACCAAGTAAA  
ACAGCATCGGAACACCAGGATCCCATGACAGATTCTGTTGTCACGTCTCCTTACAGAGTT  
TGAGCGGTGCTGAACTGTCAGCACCATCTGTCCGGTCCCAGCATGCCTTCTGAGACCCCC  
CAGGCAGAAGTGGGGCCACAGGCTGCCCCACCGCTCAGGGCCACACTCGGCGAAGGGG  
AGCCTGGAGAAGGGGTCCCCAGAGGATAAGGAAGCCAAGGAGCCCCTGTGGATCCGGCCC  
GATGCTCCGAGCAGGTGCACCTGGCAGCTGGGCCGGCCTGCCTCCGAGTCCCCACATCAC  
CACACTGCCCCGGCAAAATCTCCAAAAATCTTGCCAGATATTCTGAAGAAAATCGGGGAC  
ACCCCTATGGTCAGAATCAACAAGATTGGGAAGAAGTTCGGCCTGAAGTGTGAGCTCTTG  
GCCAAGTGTGAGTTCTTCAACGCGGGCGGGAGCGTGAAGGACCGCATCAGCCTGCGGATG  
ATTGAGGATGCTGAGCGCGACGGGACGCTGAAGCCCGGGGACACGATTATCGAGCCGACA

TCCGGGAACACCGGGATCGGGCTGGCCCTGGCTGCGGCAGTGAGGGGCTATCGCTGCATC  
ATCGTGATGCCAGAGAAGATGAGCTCCGAGAAGGTGGACGTGCTGCGGGCACTGGGGGCT  
GAGATTGTGAGGACGCCACCAATGCCAGGTTGACTCCCCGGAGTCACACGTGGGGGTG  
GCCTGGCGGCTGAAGAACGAAATCCCCAATTCTCACATCCTAGACCAGTACCGCAACGCC  
AGCAACCCCTGGCTCACTACGACACCACCGCTGATGAGATCCTGCAGCAGTGTGATGGG  
AAGCTGGACATGCTGGTGGCTTCAGTGGGCACGGGCGGCACCATCACGGGCATTGCCAGG  
AAGCTGAAGGAGAAGTGTCTGGATGCAGGATCATTGGGGTGGATCCCGAAGGGTCCATC  
CTCGCAGAGCCGGAGGAGCTGAACCAGACGGAGCAGACAACCTACGAGGTGGAAGGGATC  
GGCTACGACTTCATCCCCACGGTGCTGGACAGGACGGTGGTGGACAAGTGGTTCAAGAGC  
AACGATGAGGAGGCGTTCACCTTTGCCCGCATGCTGATCGCGCAAGAGGGGCTGCTGTGC  
GGTGGCAGTGCTGGCAGCACGGTGGCGGTGGCCGTGAAGGCCGCGCAGGAGCTGCAGGAG  
GGCCAGCGCTGCGTGGTCATTCTGCCCGACTCAGTGCGGAACTACATGACCAAGTTCCTG  
AGCGACAGGTGGATGCTGCAGAAGGGCTTTCTGAAGGAGGAGGACCTCACGGAGAAGAAG  
CCCTGGTGGTGGCACCTCCGTGTTTACAGGAGCTGGGCCTGTCAGCCCCGCTGACCGTGCTC  
CCGACCATCACCTGTGGGCACACCATCGAGATCCTCCGGGAGAAGGGCTTCGACCAGGCG  
CCCGTGGTGGATGAGGCGGGGGTAATCCTGGGAATGGTGACGCTTGGGAACATGCTCTCG  
TCCCTGCTTGCCGGGAAGGTGCAGCCGTCAGACCAAGTTGGCAAAGTCATCTACAAGCAG  
TTCAAACAGATCCGCCTCACGGACACGCTGGGCAGGCTCTCGCACATCCTGGAGATGGAC  
CACTTCGCCCTGGTGGTGCACGAGCAGATCCAGTACCACAGCACCGGGAAGTCCAGTCAG  
CGGCAGATGGTGTTCGGGGTGGTCACCGCCATTGACTTGCTGAACTTCGTGGCCGCCAG  
GAGCGGGACCAGAAGTGAAGTCCGGAGCGCTGGGCGGTGCGGAGCGGGCCCCGCCACCCTT  
GCCACTTCTCCTTCGCTTTCCTGAGCCCTAAACACACGCGTGATTGGTAACTGCCTGGC  
CTGGCACCGTTATCCCTGCACACGGCACAGAGCATCCGTCTCCCCTCGTTAACACATGGC  
TTCCTAAATGGCCCTGTTTACGGCCTATGAGATGAAATATGTGATTTTCTCTAATGTAAC  
TTCCTTTAGGATGTTTACCAAGGAAATATTGAGAGAGAAGTCGGCCAGGTAGGATGAA  
CACAGGCAATGACTGCGCAGAGTGGATTAAAGGCAAAAGAGAGAAGAGTCCAGGAAGGGG

CGGGGAGAAGCCTGGGTGGCTCAGCATCCTCCACGGGCTGCGCCGTCTGCTCGGGGCTGA  
GCTGGCGGGAGCAGTTTGCGTGTTGGGTTTTTTAATTGAGATGAAATTCAAATAACCTA  
AAAATCAATCACTTGAAAGTGAACAATCAGCGGCATTTAGTACATCCAGAAAGTTGTGTA  
GGCACCACCTCTGTCACGTTCTGGAACATTCTGTCATCACCCCGTGAAGCAATCATTTC  
CCTCCCGTCTTCCTCCTCCCCTGGCAACTGCTGATCGACTTTGTGTCTCTGTTGTCTAAA  
ATAGGTTTTCCCTGTTCTGGACATTTTCATATAAATGGAATCACACAAAAAAAAAAAAAAAA  
AAAAAA.
